# Supplementary material for: UiO-67 metal–organic framework immobilized Fe3+ catalyst for efficient Morita–Baylis–Hillman reaction
Source: Royal Society of Chemistry journal article supplement (doi:10.1039/d1nj04544j), 2022-01-01

## **UiO-67 Metal-organic framework immobilized Fe<sup>3+</sup> catalyst for efficient Morita-Baylis-Hillman reaction**

Yuzhen Zhao<sup>a</sup>, Min Zhu<sup>a</sup>, Hailing Shang<sup>b</sup>, Daniele Ramella<sup>c</sup>, Kaicheng Zhu<sup>a,\*</sup>, Yi Luan<sup>b,\*</sup>

<sup>a</sup> Xi'an Key Laboratory of Advanced Photo-electronics Materials and Energy Conversion Device, School of Sciences, Xijing University, Xi'an, 710123, China.

<sup>b</sup> School of Materials Science and Engineering, University of Science and Technology Beijing, 30 Xueyuan Road, Haidian District, Beijing 100083, P. R. China, E-mail: yiluan@ustb.edu.cn.

<sup>c</sup> Department of chemistry, Temple University-Beury Hall, 1901, N. 13th Street Philadelphia PA 19122, United States.

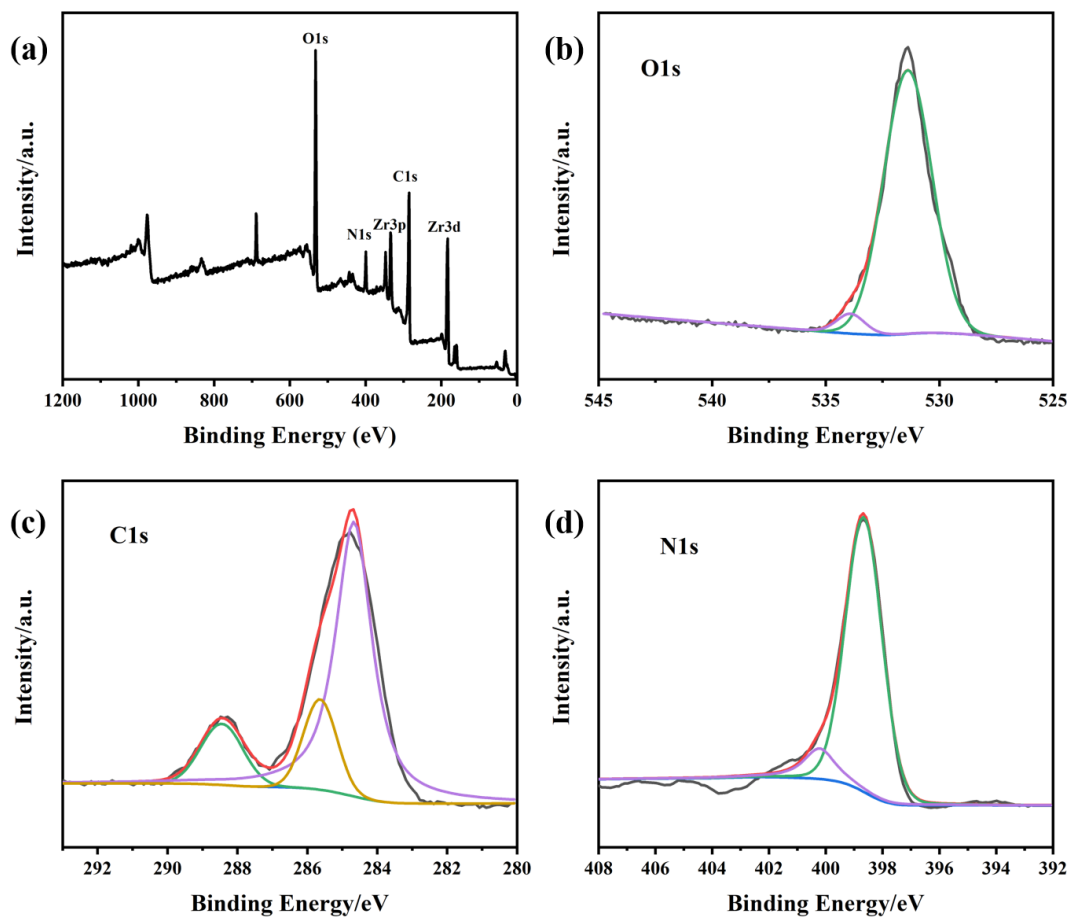

Fig. S1 XPS spectra of UiO-67

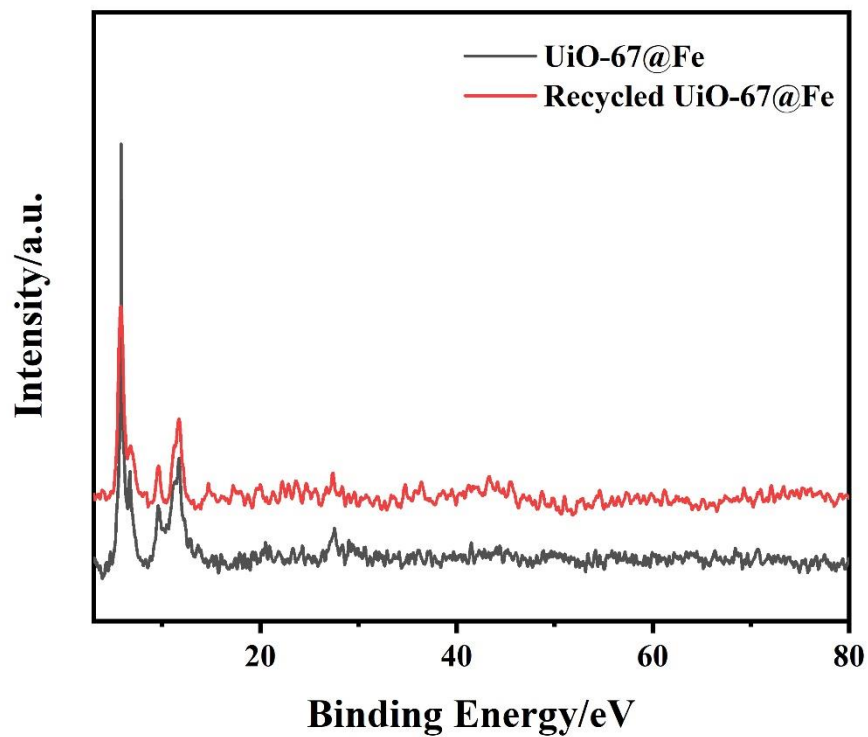

Fig. S2 PXRD pattern of UiO-67@Fe and recycled UiO-67@Fe

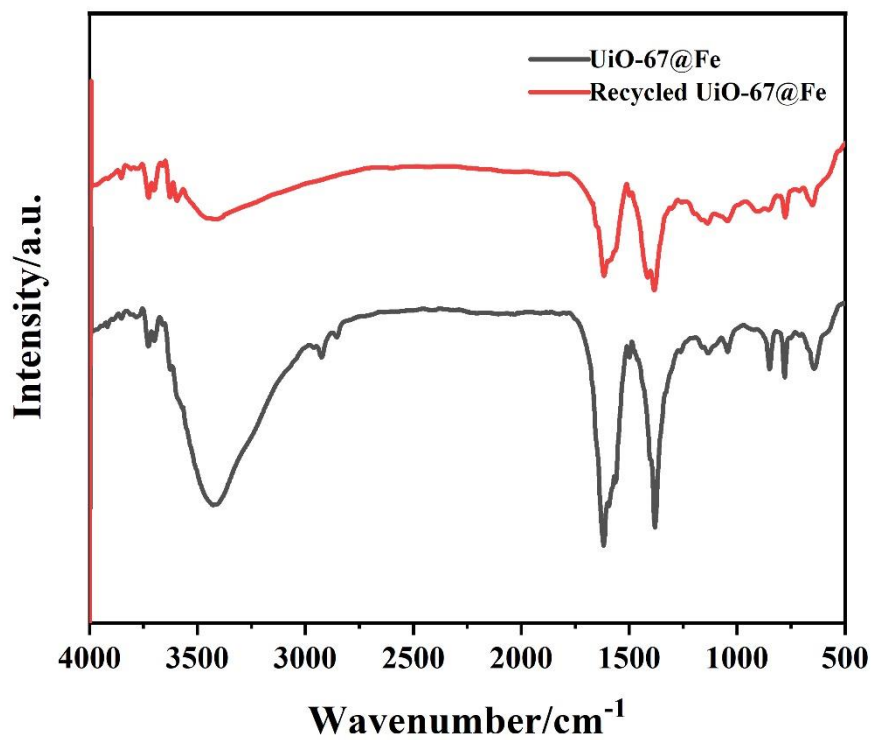

Fig. S3 FT-IR pattern of UiO-67@Fe and recycled UiO-67@Fe

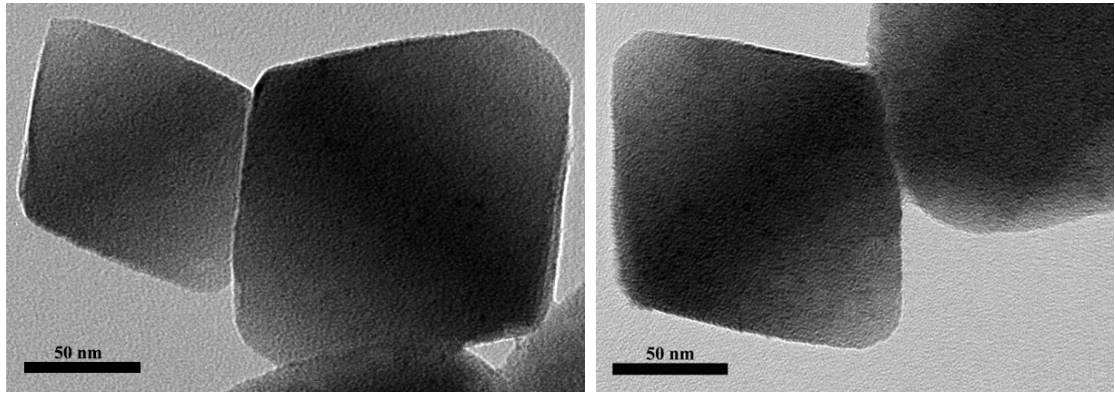

**Fig. S4** TEM observation of UiO-67

**Table S1** Various catalysts of MBH reaction of cyclopentenone with benzaldehyde.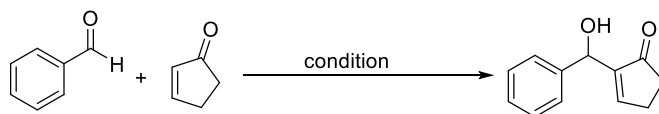

| Entry | Catalyst                                                         | Solvent                                             | Time (h) | Temp. (°C) | Yield (%) | TON <sup>a</sup> | TOF (h <sup>-1</sup> ) <sup>b</sup> | References       |
|-------|------------------------------------------------------------------|-----------------------------------------------------|----------|------------|-----------|------------------|-------------------------------------|------------------|
| 1     | <b>UiO-67@Fe (1.0 mol%)</b>                                      | <b>THF</b>                                          | <b>6</b> | <b>23</b>  | <b>93</b> | <b>93</b>        | <b>15.5</b>                         | <b>This work</b> |
| 2     | NMP (5.0 mol%)/Ba(OH) <sub>2</sub> (1.5 mol%) <sup>[1]</sup>     | CH <sub>3</sub> OH /CH <sub>2</sub> Cl <sub>2</sub> | 9        | 0          | 72        | 48               | 5.3                                 | [1]              |
| 3     | α-ZrP/Uracil/Cu <sup>2+</sup> (20mg) <sup>[2]</sup>              | DMF                                                 | 15       | r.t.       | 74        | -                | -                                   | [2]              |
| 4     | Fu (+)-DMAP/(10mol%)<br>MgI <sub>2</sub> (50mol%) <sup>[3]</sup> | <i>i</i> -PrOH                                      | 24       | -20        | 87        | 8.7              | 0.36                                | [3]              |
| 5     | IRMOF-3-thiourea (2 mol%) <sup>[4]</sup>                         | THF                                                 | 24       | 4          | 73        | 36.5             | 1.52                                | [4]              |

<sup>a</sup> Turnover number = mol converted/mol of active sites. <sup>b</sup> Turnover frequency = Turnover number/reaction time.

## References

- [1] K. P. Guerra, C. A. M. Afonso, *Tetrahedron*, 2011, 67, 2562-2569.
- [2] R. Hajipour, S. Zakery, *Appl Organometal Chem.*, 2018, 32, e4487.
- [3] Bugarin, B. T. Connell, *Chem. Commun.*, 2010, 46, 2644–2646.
- [4] Y. Luan, N. Zheng, Y. Qi, J. Tang, G. Wang, *Catal. Sci. Technol.*, 2014, 4, 925-929.

**NMR spectra:**

**3a** 2-[(4-Fluoro-phenyl)-hydroxy-methyl]-cyclopent-2-enone

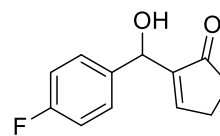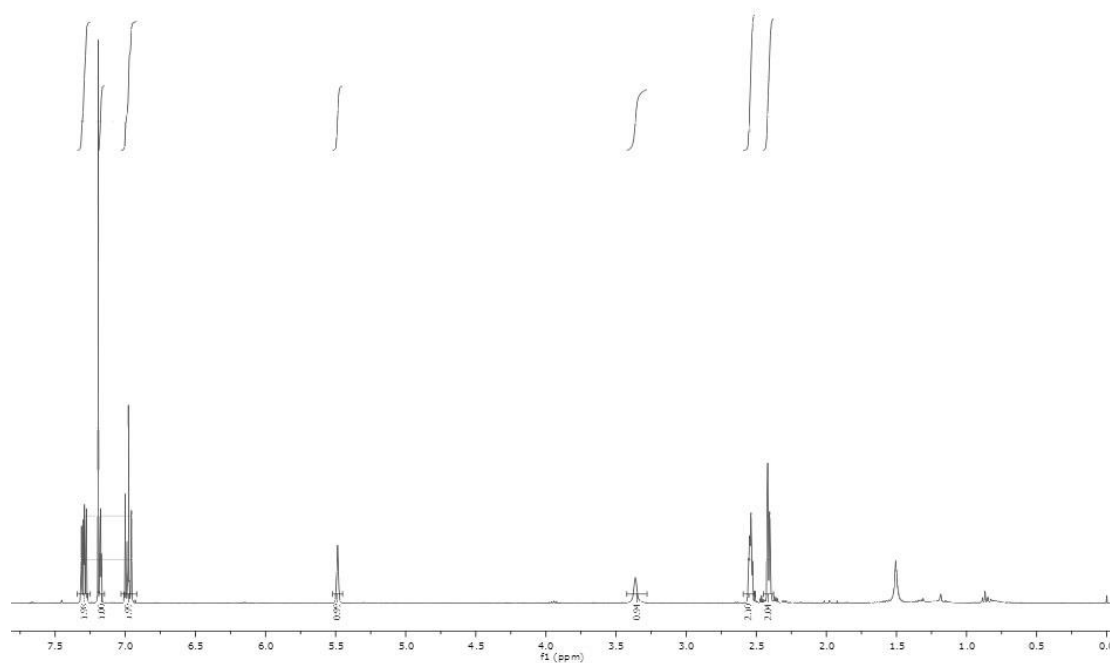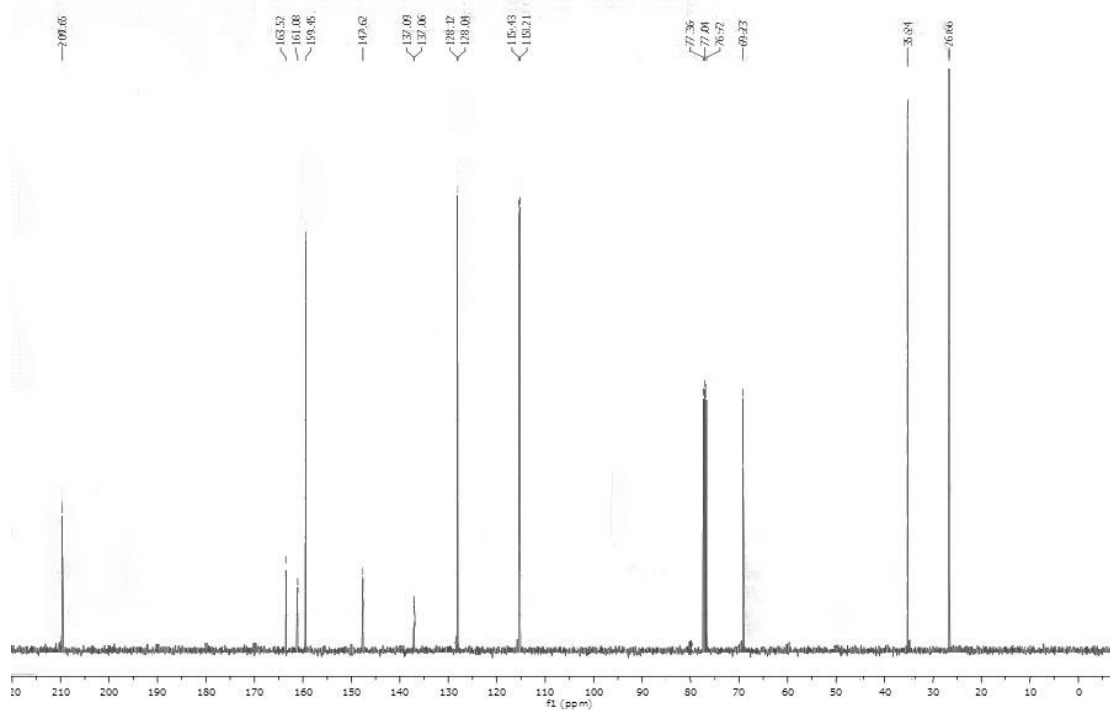

**3b** 2-[(4-Bromo-phenyl)-hydroxy-methyl]-cyclopent-2-enone

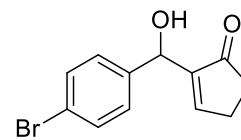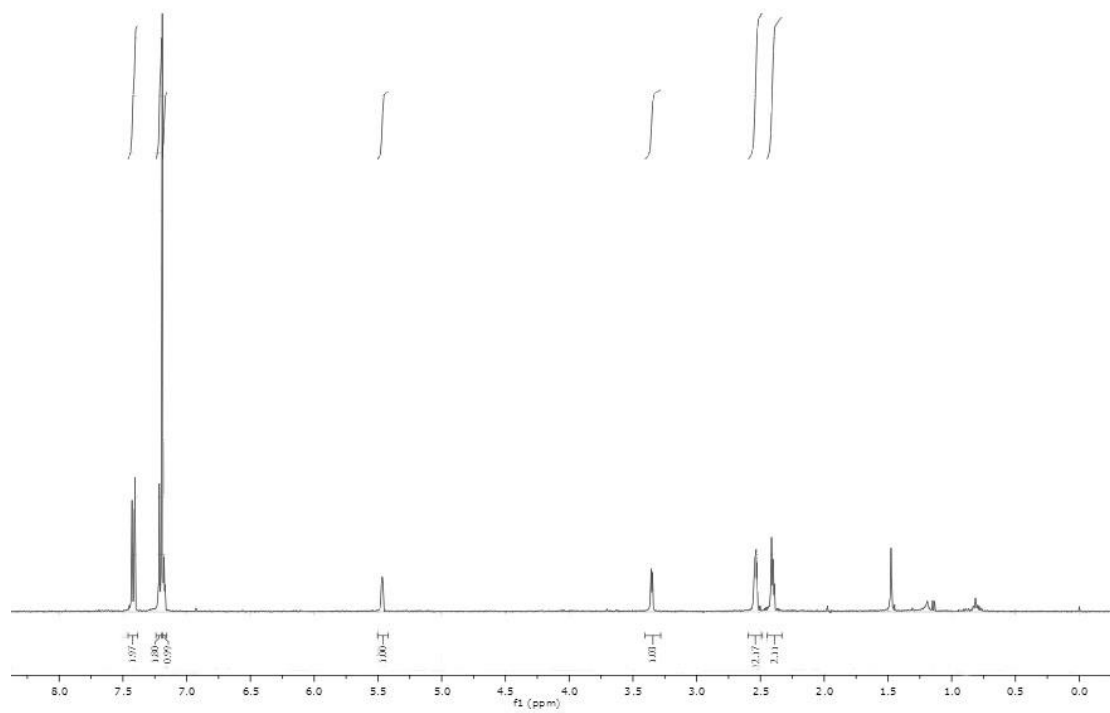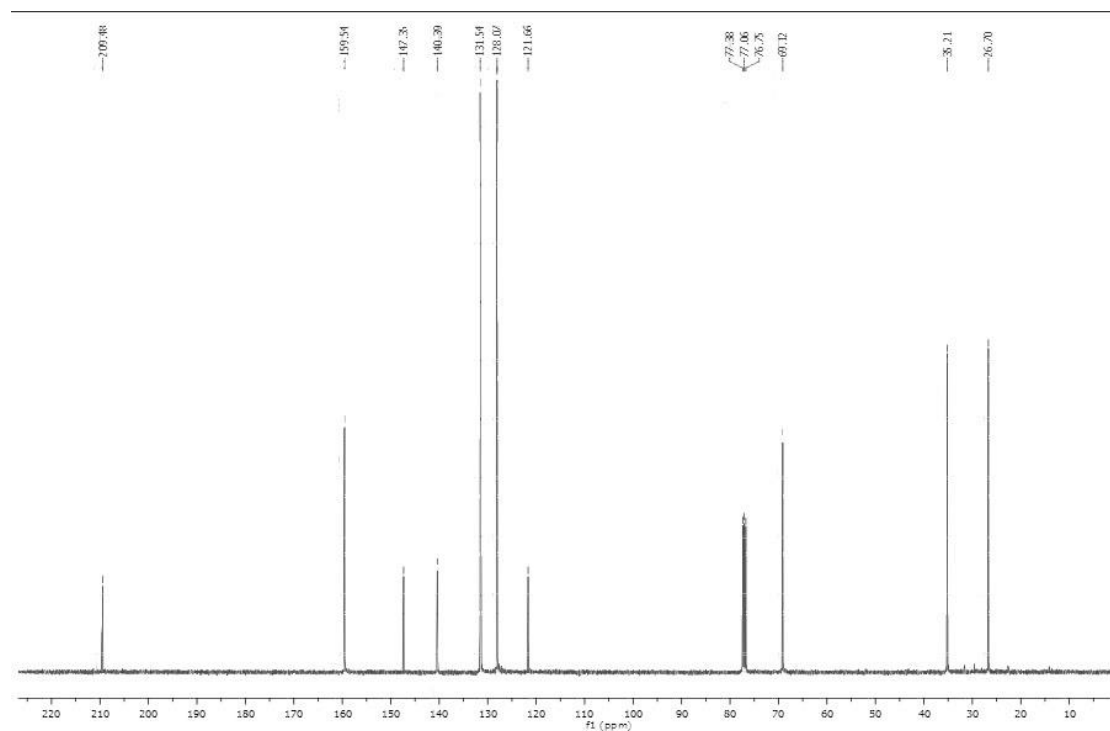





**3d** 2-[(4-Chloro-phenyl)-hydroxy-methyl]-cyclopent-2-enone

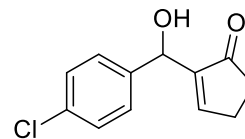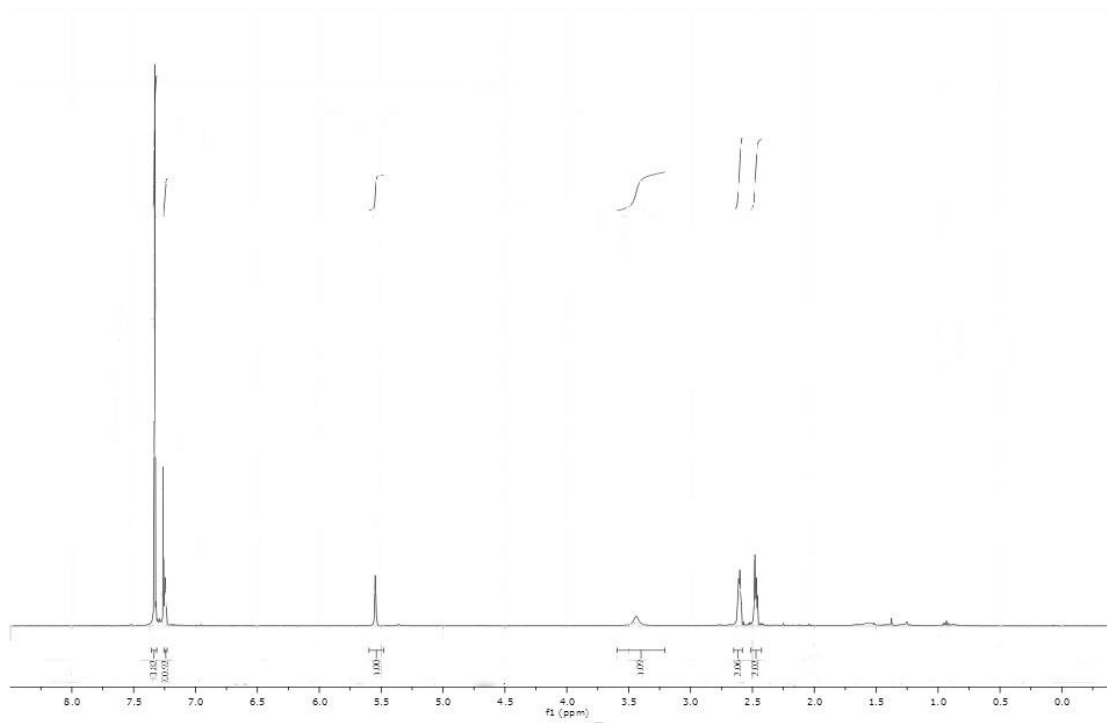

— 209.73

— 159.73

— 147.58

— 140.01

— 133.69

— 128.78

— 127.91

— 77.55

— 77.23

— 76.91

— 69.29

— 35.39

— 26.87

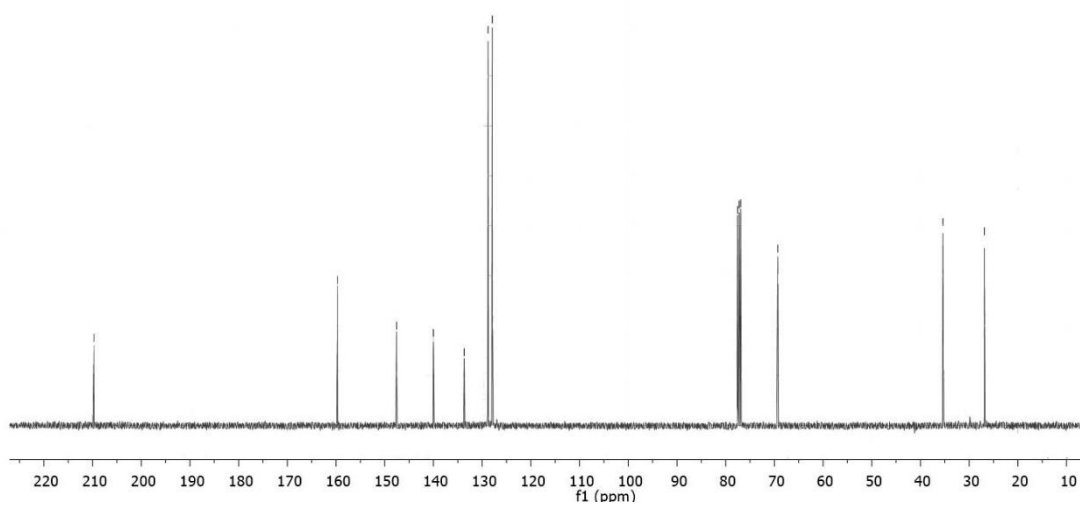

**3e** 2-(Hydroxy-phenyl-methyl)-cyclopent-2-enone

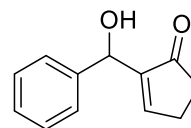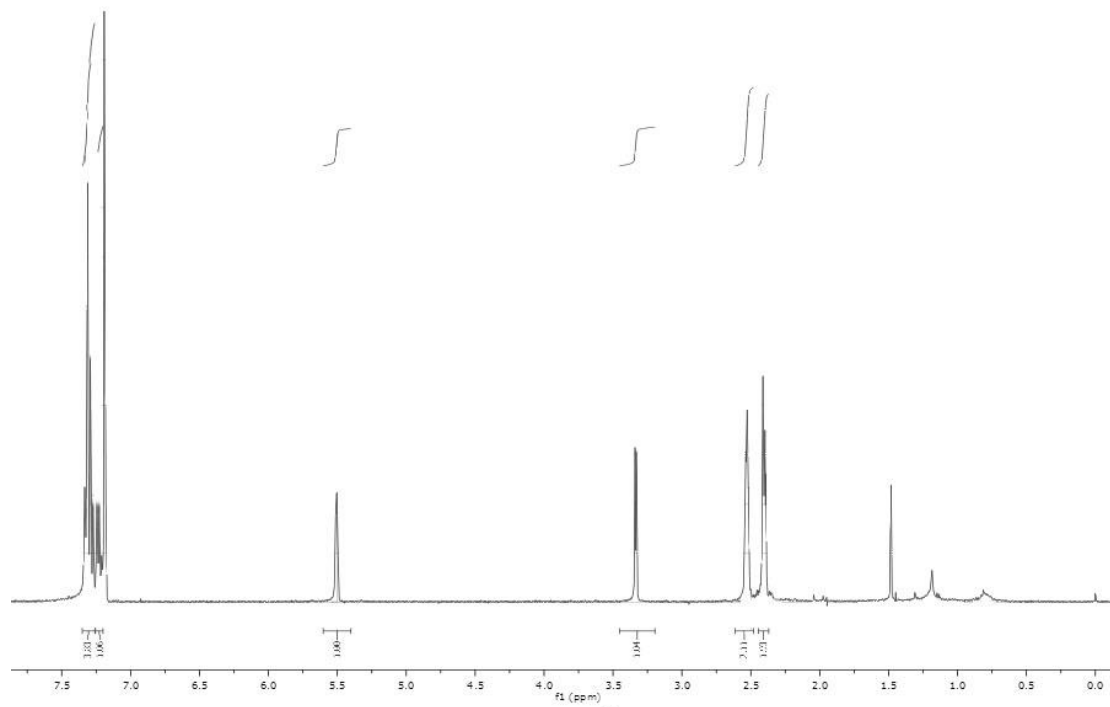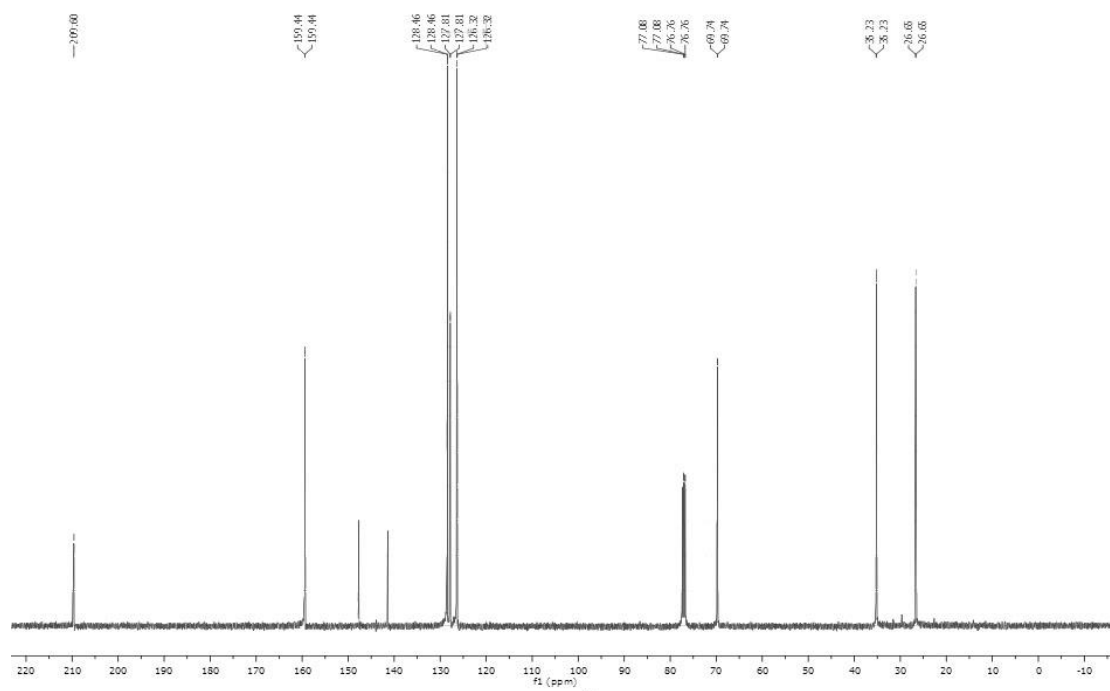



**3g** 2-[Hydroxy-(4-methoxy-phenyl)-methyl]-cyclopent-2-enone

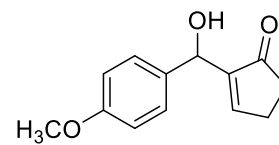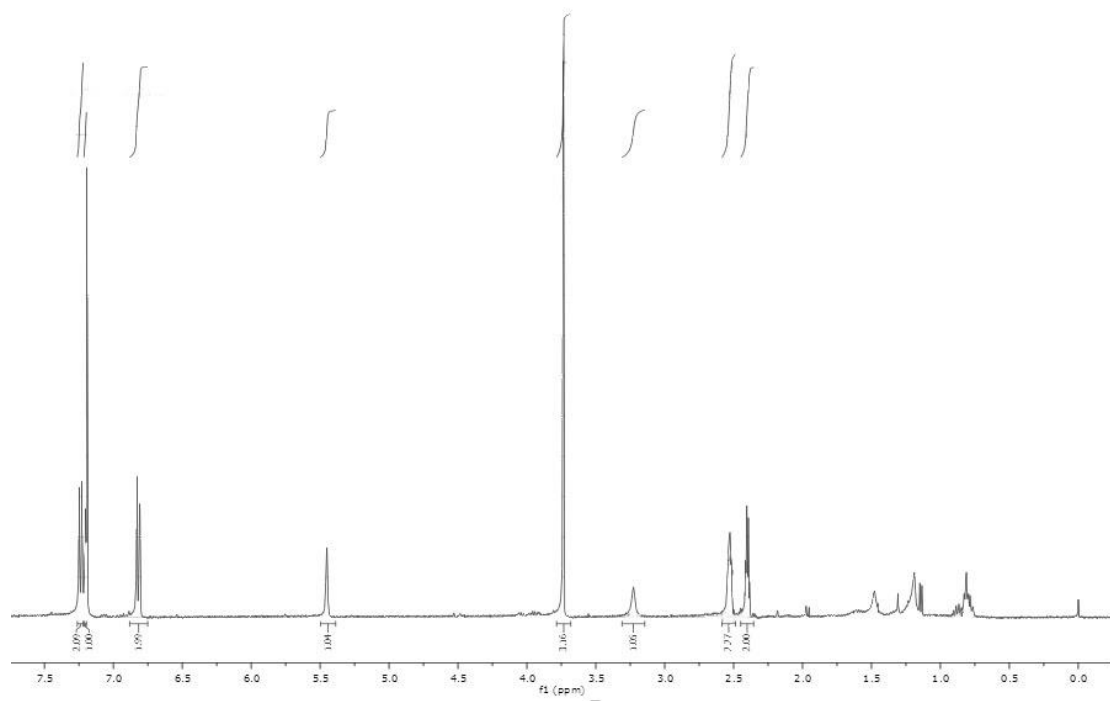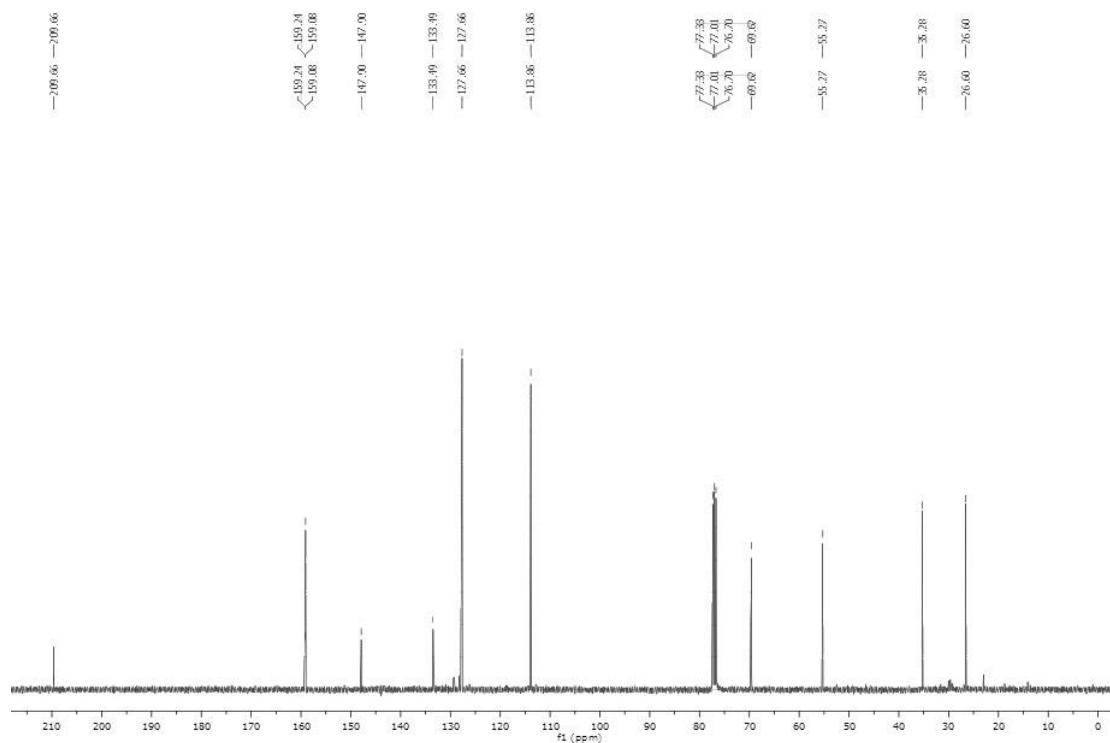

**3h** 2-(Hydroxy-naphthalen-2-yl-methyl)-cyclopent-2-enone

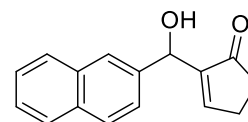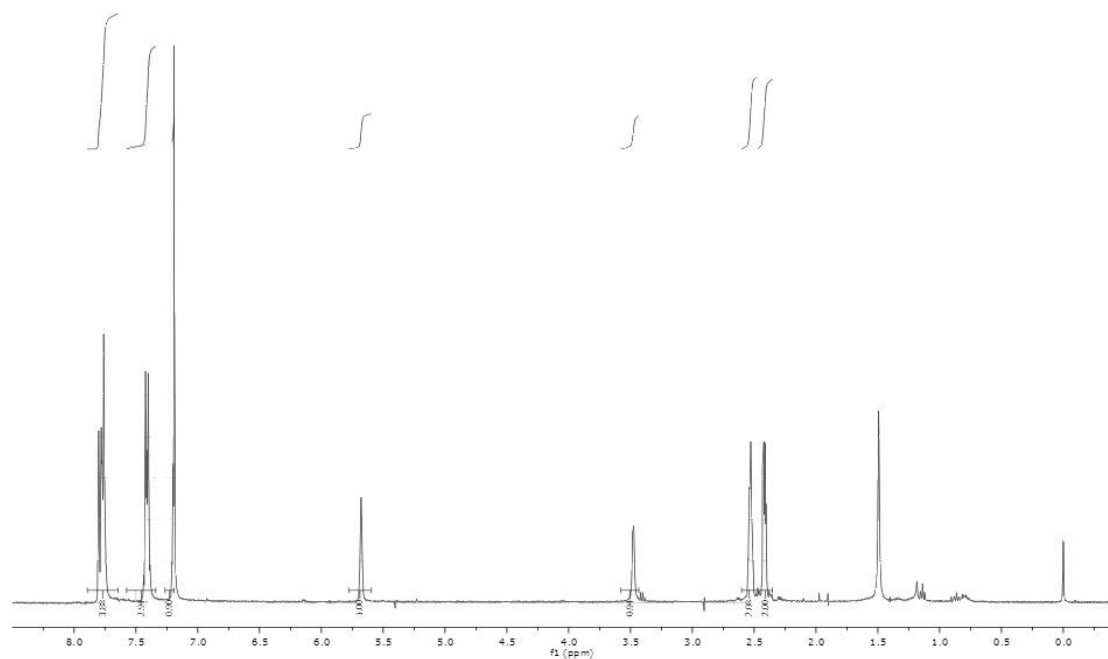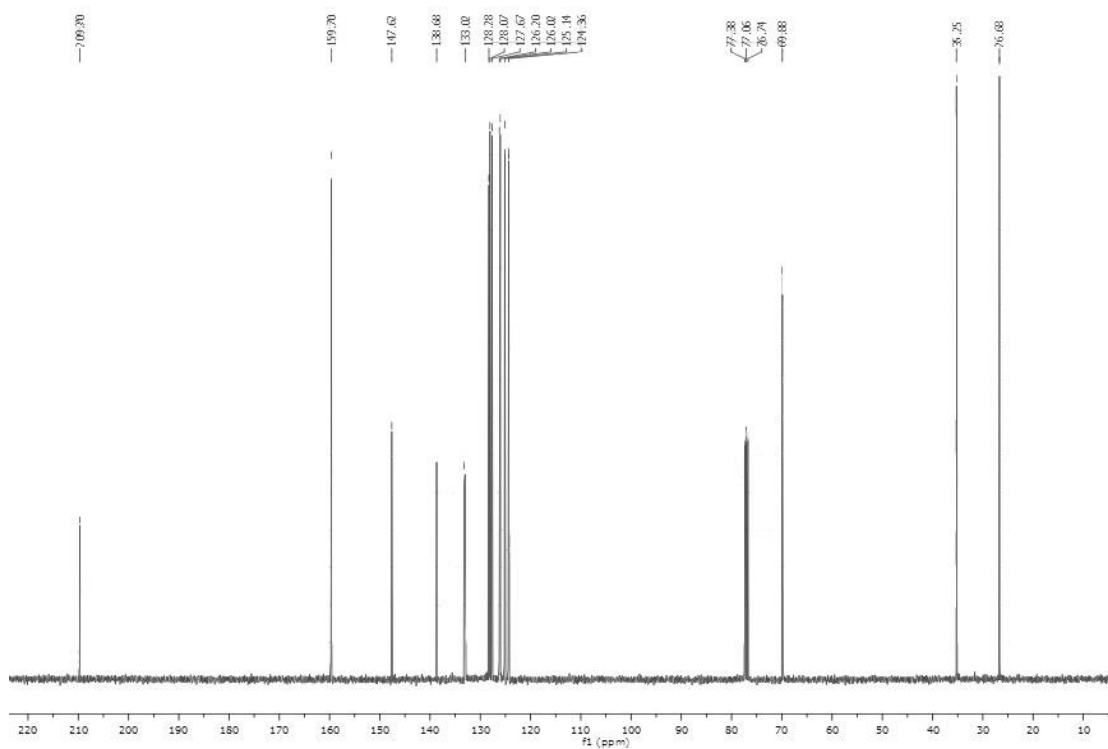

3i 2-(1-Hydroxy-3-phenyl-allyl)-cyclopent-2-enone

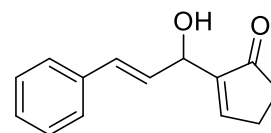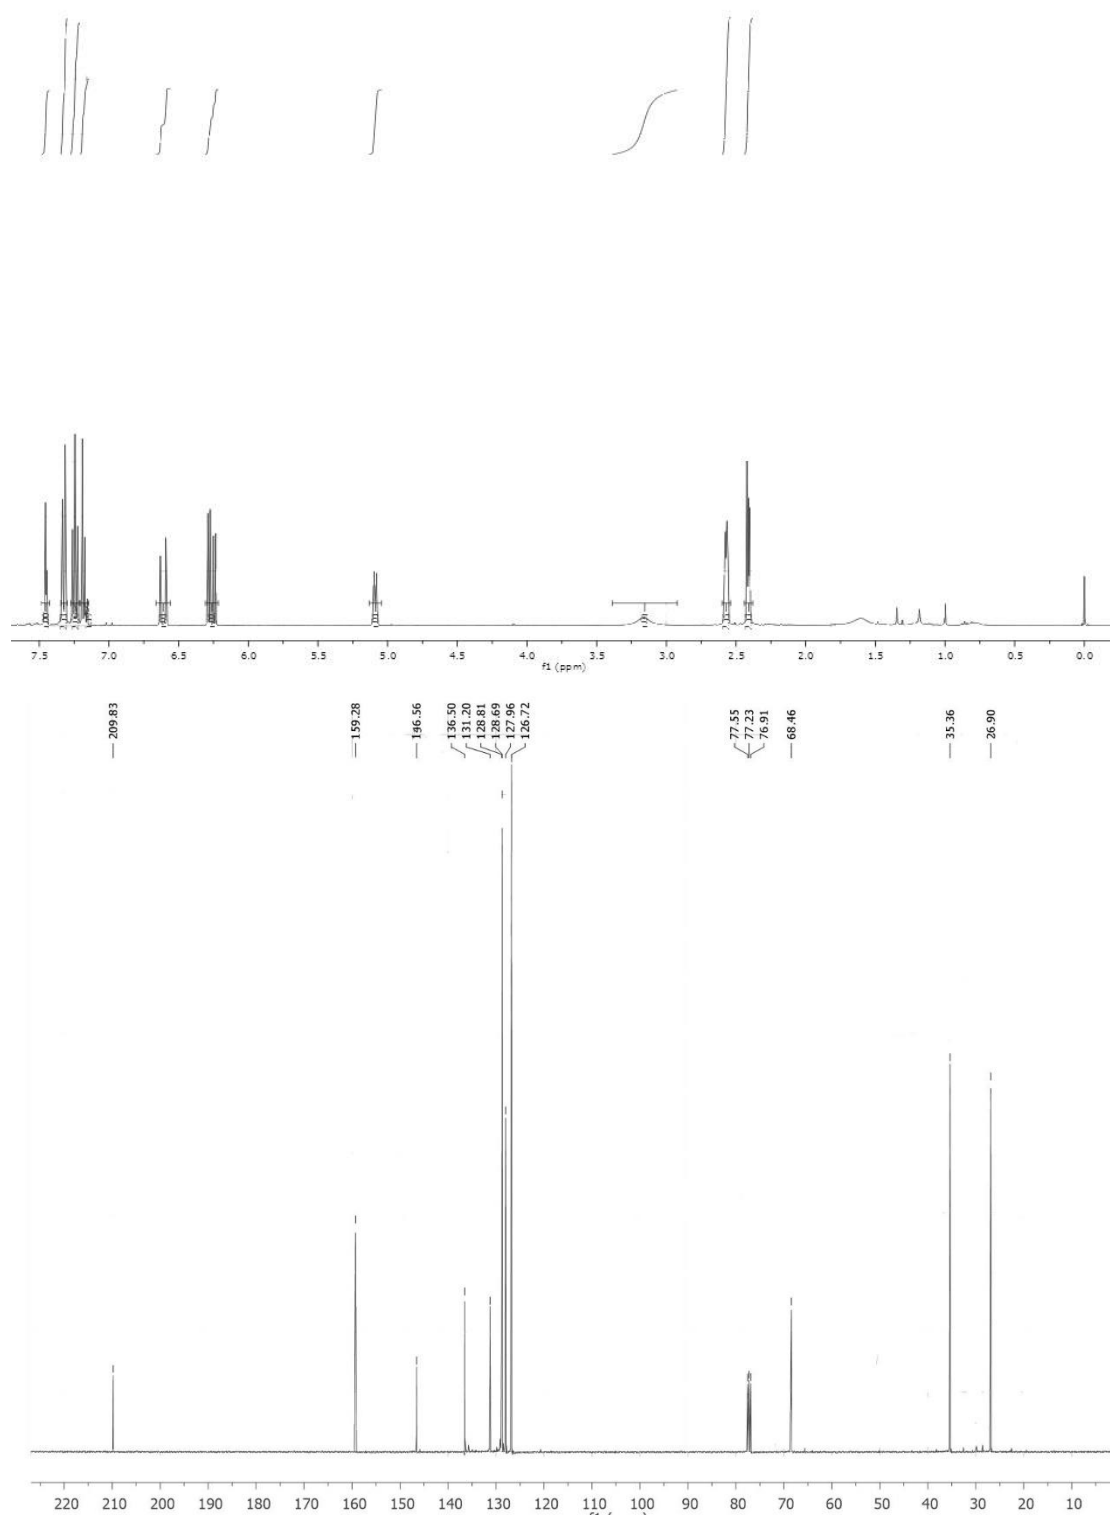

3j 2-(1-Hydroxy-3-phenyl-propyl)-cyclopent-2-enone

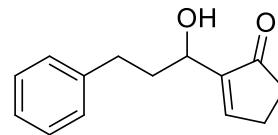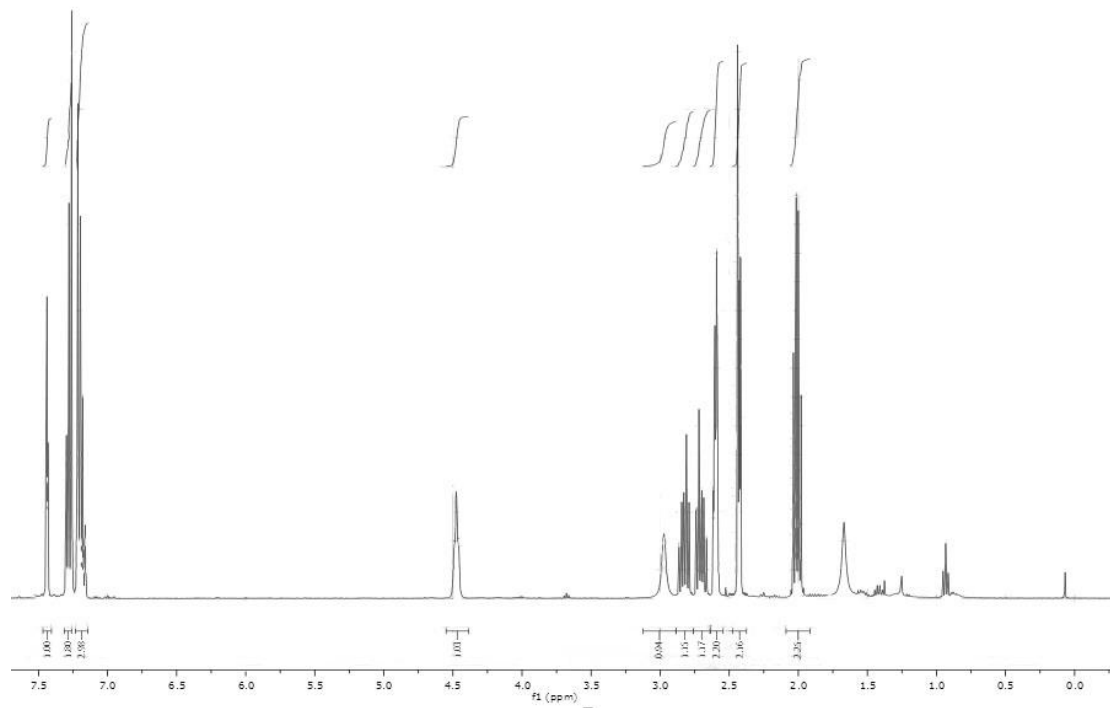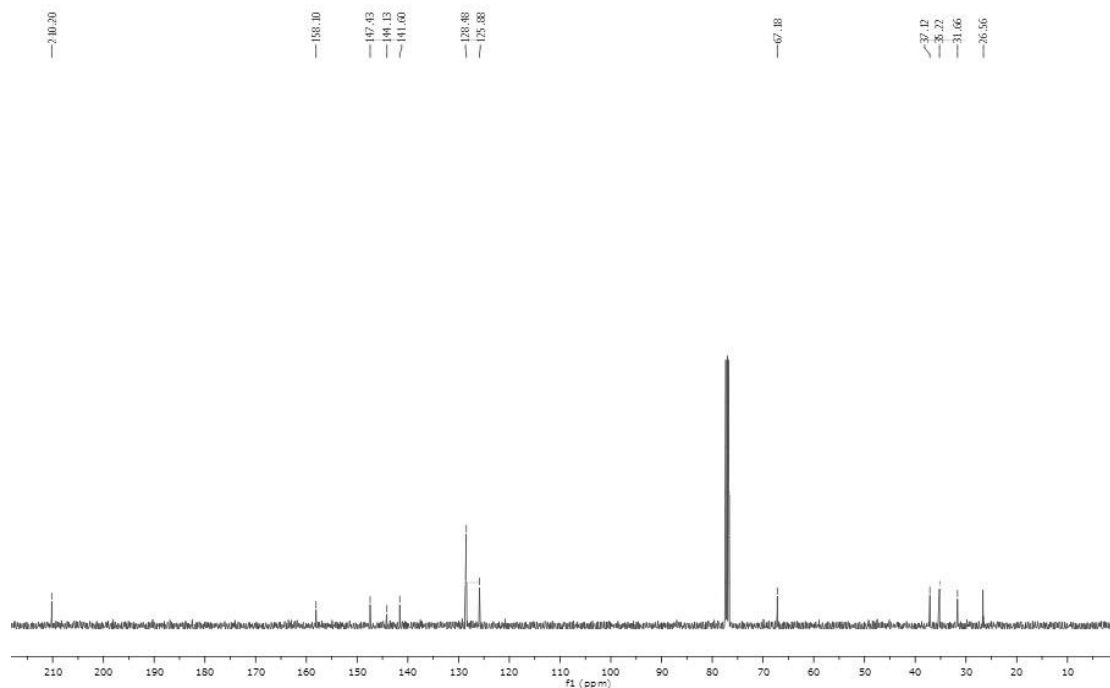

Supplement: d1nj04544j1.pdf [file d1nj04544j1.pdf]
